# Supplementary material for: Effect of multiple renal artery clamping on postoperative renal function in robot-assisted partial nephrectomy: A propensity-matched study
Source: Research Square preprint supplement (doi:10.21203/rs.3.rs-8153981/v1), 2025-12-02
Supplement: Supplementary file 1 [file 9f7813c43d4dfe2d8c3956d2.xlsx]

## Sheet: Table 1
	Prepropensity cohort			Postpropensity cohort
	Single clamp	Multiple clamp	P value	Single clamp	Multiple clamp	P value
	(n=667)	(n=27)		(n=26)	(n=26)
Age, year, mean (SD)	62.9 (12.9)	61.4 (12.9)	0.55	60.1 (14.6)	61.6 (13.1)	0.698
Sex, n (%)			0.52			0.778
Male	471 (70.6%)	21 (77.8％)		27（75.0％）	29（80.6％）
Female	196 (29.4%)	6 (22.2％)		9（25.0％）	7（19.4％）
BMI, kg/m2, mean (SD)	24.5 (3.99)	25.5 (3.97)	0.164	24.6 (3.92)	25.5 (3.76)	0.462
ASA, n (%)			0.16			1
1	88 (13.4％)	9（24.3％）		6（23.1％）	5（19.2％）
2	551（83.6％）	28（75.7％）		20（76.9％）	21（80.8％）
3	20（3.0％）	0		0	0
DM, n (%)	113（16.9％）	3（11.1％）	0.6	1（3.8％）	3（11.5％）	0.61
HT, n (%)	321（48.1％）	12（44.4％）	0.845	10（38.5％）	12（46.2％）	0.779
Laterality, n (%)			0.772			0.153
Right	352 (52.8%)	13 (48.1%)		19（73.1％）	13（50.0％）
Left	315 (47.2%）	14 (51.9％)		7（26.9％）	13（50.0％）
Tumor size, mm, mean (SD)	28.5 (12.2)	28.8 (14.6)	0.902	29.9 (10.3)	28.5(14.9)	0.714
Clinical T stage, n (%)			0.617			1
cT1a	543 (81.4%)	21 (77.8%)		21（80.8％）	20（76.9％）
cT1b	124 (18.6%)	6 (22.2%)		5（19.2％）	6（23.1％）
Preoperative eGFR,	68.8 (19.0)	70.2 (16.0)	0.712	74.7 (25.6)	70.6 (16.1)	0.494
mL/min/1.73 m2, mean, (SD)
Pre CKD grade, n (%)			0.978			0.594
1	74 (11.3%)	3 (11.1%)		5（19.2％）	3（11.5％）
2	383 (58.7%)	16 (59.3%)		12（46.2％）	16（61.5％）
3	179 (27.5%)	8 (29.6%)		9（34.6％）	7（26.9％）
4	14 (2.1%)	0		0	0
5	2 (0.3%)	0		0	0
RENAL nephrometry score, n (%)			0.739			0.197
4, 5, 6	288 (43.2%)	13 (48.1%)		7（26.9％）	13（50.0％）
7, 8, 9	317 (47.5%)	11 (40.7％）		16（61.5％）	10（38.5％）
10, 11	62 (9.3%)	3 (11.1%)		3（11.5％）	3（11.5％）

## Sheet: Table 2
	Prepropensity cohort			Postpropensity cohort
	Single clamp	Multiple clamp	P value	Single clamp	Multiple clamp	P value
	(n=667)	(n=27)		(n=26)	(n=26)
Surgical approach, n (%)			0.698			0.577
Intraperitoneal	317 (47.5%)	14 (51.9%)		10（38.5％）	13（50.0％）
Retroperitoneal	350 (52.5%)	13 (48.1%)		16（61.5％）	13（50.0％）
Operative time, min, mean (SD)	193.4 (42.5)	209.0 (58.7)	0.065	198 (44.2)	218.2 (70.3)	0.149
WIT, min, mean (IQR)	18.9 (6.68)	18.8 (6.14)	0.94	15.8 (5.51)	18.6 (6.14)	0.097
Achievement of WIT <25min, n (%)	552 (82.8%)	20 (74.1%)	0.298	25 (96.2%)	20 (76.9%)	0.099
EBL, ml, mean (SD)	62.3 (124.1)	103.2(268.6)	0.116	53.7 (103.5)	107 (273.1)	0.355
Positive surgical margin, n (%)	7 (1.1%)	0	1	0	0	1
Achivement of trifecta, n (％)	485 (77.2%)	19 (73.1%)	0.635	23 (92.0%)	19 (76.0%)	0.247

## Sheet: Table 3
	Prepropensity cohort			Postpropensity cohort
	Single clamp	Multiple clamp	P value	Single clamp	Multiple clamp	P value
	(n=667)	(n=27)		(n=26)	(n=26)
Postoperative eGFR at 7 days, mean (SD)	61.3 (18.1)	63.1 (14.7)	0.62	65.8 (20.0)	63.4 (14.9)	0.62
Postoperative eGFR at 1 year, mean (SD)	59.9 (16.3)	59.6 (13.6)	0.934	62.3 (18.8)	50.3 (13.8)	0.746
Achievement of postoperative renal function preservation rate (90%) at 1 year, n (%)	192 (42.7%)	5 (33.3%)	0.581	10 (52.6%)	5 (35.7%)	0.482
CKD progression, n (%)	108 (23.9%)	2 (13.3%)	0.53	4 (21.1%)	2 (14.3%)	1
Introduction of dialysis, n (%)	2 (0.3%)	0	1	1 (4.0%)	0	0.49
